# Supplementary material for: The mechanism difference between CO2 and pH stimuli for a dual responsive wormlike micellar system
Source: Royal Society of Chemistry journal article supplement (doi:10.1039/c8cp02107d), 2018-01-01
Supplement: c8cp02107d1.pdf [file c8cp02107d1.pdf]

## Supporting Information

### **The Mechanism Difference between CO<sub>2</sub> and pH Stimuli for a Dual Responsive Wormlike Micellar System**

*Caili Dai\*, Qianru Yang, Mingwei Gao, Mingwei Zhao\*, Jianfeng Jiang*

*School of Petroleum Engineering, State Key Laboratory of Heavy Oil Processing,*

*China University of Petroleum (East China), Qingdao 266580, P. R. China*

Caili Dai      Email: daicl@upc.edu.cn

Tel: +86-532-86981183      Fax: +86-532-86981161

Mingwei Zhao      Email: zhaomingwei@upc.edu.cn

Tel: +86-532-86981183      Fax: +86-532-86981161

For the better understanding of this system, effect of temperature on the system has been done on the rheological properties. The steady shear viscosity curve of this system at different temperatures can be shown from Figure S1 a. The three curves all can be fallen into two parts, which showed the zero steady shear viscosity ( $\eta_0$ ) in the low steady shear rate, while shear-thinning behavior was performed in the higher steady shear rate. It is usually regarded as the formation of wormlike micelles<sup>1,2</sup>. At 35 °C,  $\eta_0$  reaches the maximum value. This may be due to the tight wormlike micelles and stable network structure at 35 °C.

Besides steady shear measurements, oscillatory shear measurements at different temperatures are shown in Figure S1 b. The systems all showed liquid-like behavior and solid-like behavior at low shear frequencies and high shear frequencies ( $\omega$ ), respectively. The elastic modulus ( $G'$ ) growth rate is greater than viscous modulus ( $G''$ ) with the increasing shear frequencies, the two curves intersect at the shear rate ( $\omega_c$ ). With the increase of the shear frequencies,  $G'$  kept on increasing until a platform modulus value ( $G_0$ ) while the  $G''$  reached the crest and then decreased. When  $G''$  decreased to the minimum, the value is called  $G_{min}''$ . Overall, these rheological behaviors (steady shear measurements, oscillatory shear measurements) are the typical representation of wormlike micelles, which follow the Maxwell's model<sup>3-5</sup>. Thus, the behaviors of the system accords with Maxwell equations:

$$G'(\omega) = G_0 \frac{\omega^2 t_R^2}{1 + \omega^2 t_R^2} \quad (1)$$

$$G''(\omega) = G_0 \frac{\omega t_R}{1 + \omega^2 t_R^2} \quad (2)$$

$$t_R = \frac{1}{\omega^*} \quad (3)$$

$$G_0 = 2G^* \quad (4)$$

Where  $G_0$  and  $\omega$  are the platform modulus and angular rate, respectively, and  $t_R$  is the relaxation time calculated from equation (3). If  $G_0$  cannot reach the platform,  $G_0$  value can be estimated by equation (4).

To further prove how well the system fit with the Maxwell model with the rising of temperature, the Cole-Cole plot is commonly used. Cole-Cole plot is a curve of  $G'$  as a function of  $G''$ . The equation is as follows, which is established by equation (1) and (2):

$$G''^2 + \left(G' - \frac{G_0}{2}\right)^2 = \left(\frac{G_0}{2}\right)^2 \quad (5)$$

In Figure S1 c, in the low shear frequencies, the experimental points fit well with the theoretical line reckoned through equation (5) due to Rouse relaxation modes<sup>6, 7</sup>. While the deviation appears at higher shear frequencies since Rouse relaxation modes<sup>8</sup>. With the rise of temperature, the deviation occurs at smaller shear rate because of different micelle winding degrees.

In addition, as Maxwell model fluid, the average micellar contour length ( $L$ ) of wormlike micelles can be calculated as follows:

$$L \approx l_c \frac{G_0'}{G_{min}''} \quad (6)$$

Where  $l_c$  is the average length between entanglement points, which typical value of 80-150 nm is known from the above reference<sup>9</sup>.  $G_{min}''$  is the minimum of the viscous modulus ( $G''$ ) in the high shear frequencies.

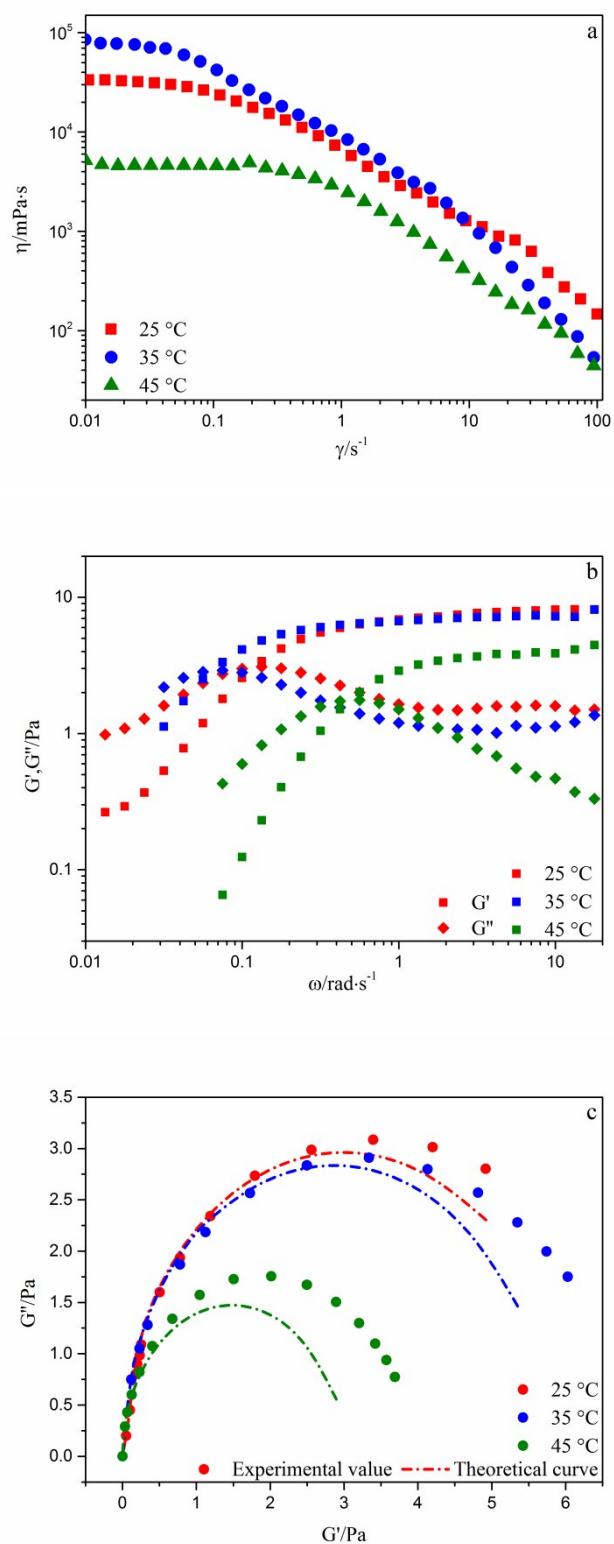

Figure S1. 40 mM NDPD and 60 mM NaSal system at different temperatures: (a) steady shear viscosity curve; (b)  $G'$  and  $G''$  versus frequencies; (c) Cole-Cole plots.

## References

1. A. S. Sarvestani, *European Polymer Journal*, 2008, **44**, 263-269.
2. M. Vasudevan, A. Shen, B. Khomami and R. Sureshkumar, *Journal of Rheology*, 2007, **52**, 527-550.
3. K. Kataoka, A. Harada and Y. Nagasaki, *Advanced Drug Delivery Reviews*, 2012, **64**, 37-48.
4. M. E. Cates, *Macromolecules*, 1987, **20**, 2289-2296.
5. R. Granek and M. E. Cates, *Journal of Chemical Physics*, 1992, **96**, 4758-4767.
6. C. A. Dreiss, *Soft Matter*, 2007, **3**, 956-970.
7. A. Song and J. Hao, *Journal of Colloid & Interface Science*, 2011, **353**, 231-236.
8. J. H. Jeon, N. Leijnse, L. B. Oddershede and R. Metzler, *New Journal of Physics*, 2013, **15**, 045011.
9. S. R. Raghavan, A. Håkan Edlund and E. W. Kaler, *Langmuir*, 2015, **18**, 1056-1064.
